# Supplementary material
Source: Royal Society of Chemistry journal article supplement (doi:10.1039/d6lc00134c)
Supplement: d6lc00134c1.pdf [file d6lc00134c1.pdf]

[Supplementary information]

**Automation-assisted human skin-on-a-chip for modeling ultraviolet-induced injury and  
evaluation of photoprotective and regenerative modalities**

Yu-Jeong Lee<sup>a</sup>, Jieun Lee<sup>b</sup>, Yoojin Na<sup>b</sup>, Hoon Suk Rho<sup>b</sup>, Min-Kyu Kang<sup>a</sup>, YongTae Kim<sup>\*b</sup>,  
and Jeong-Kee Yoon<sup>\*a</sup>

<sup>a</sup>Department of Systems Biotechnology, Chung-Ang University, Anseong-Si, Gyeonggi-Do,  
17546, Republic of Korea.

<sup>b</sup>Mepsgen Co. Ltd, Seoul, Republic of Korea.

Email: jyoons342@cau.ac.kr (J. -K. Yoon) and ytkim@mepsgen.com (Y. Kim)

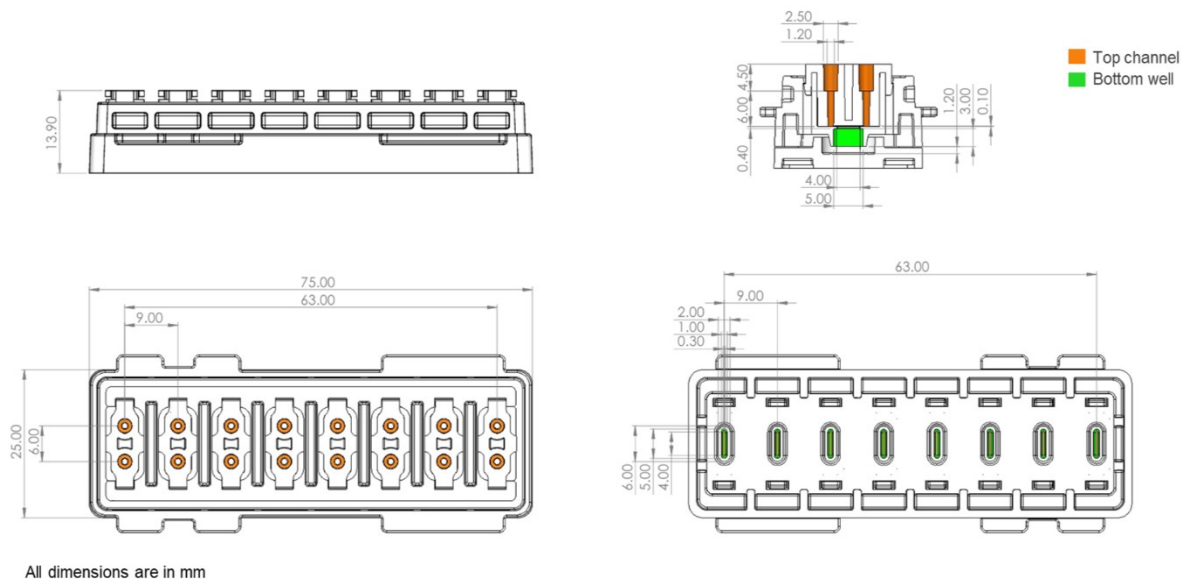

**Figure S1. Dimensioned engineering drawings of the MEPS-TBC-WL device.**

Top, side, and cross-sectional views are shown to illustrate the overall device footprint, 8-unit layout, and relative positions of the apical top channel (orange) and basolateral bottom well (green). Per unit, the total accessible volume of the apical channel compartment was 60  $\mu\text{L}$ , consisting of approximately 20  $\mu\text{L}$  in each inlet and outlet reservoir and approximately 20  $\mu\text{L}$  in the channel region extending from the narrow connecting channel to the membrane-overlying area. The basolateral microwell had a working volume of 15  $\mu\text{L}$ .

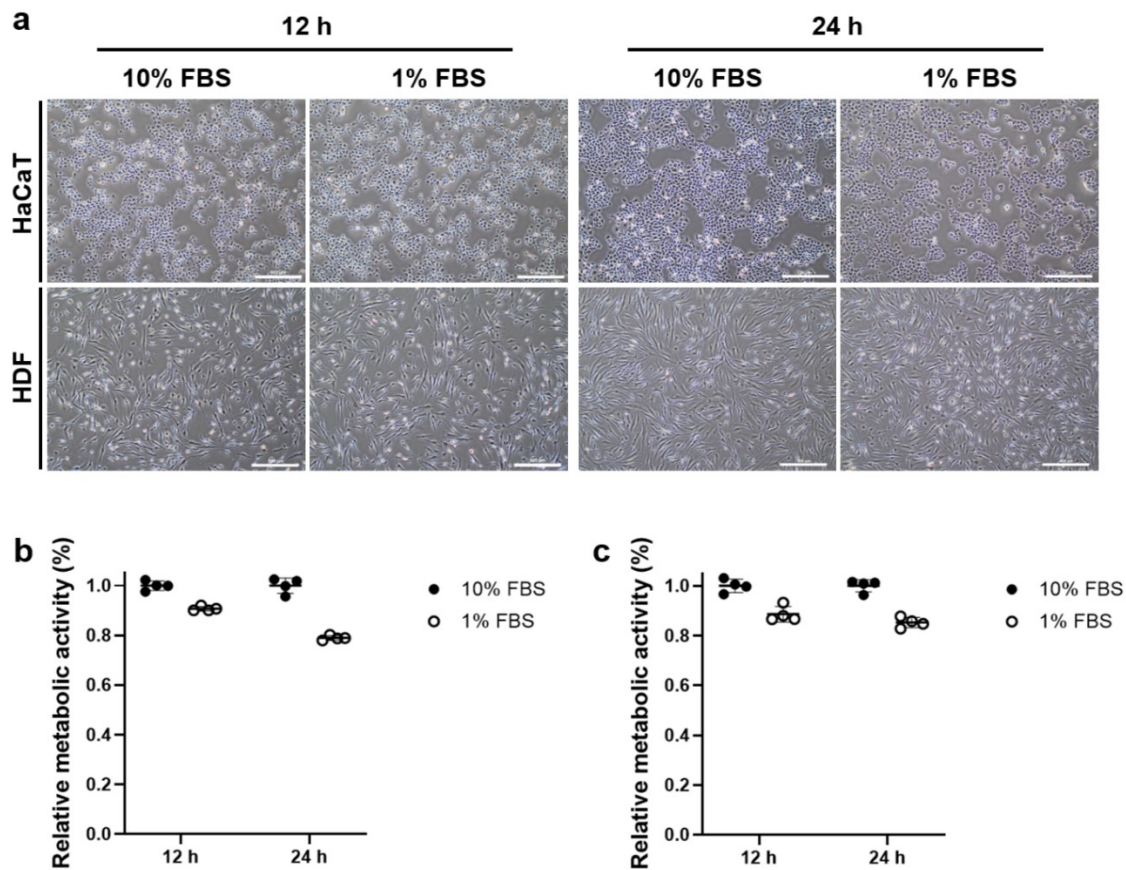

**Figure S2. Validation of the low-serum pretreatment condition in HaCaTs and HDFs.**

(a) Representative brightfield images of HaCaTs and HDFs after incubation in 10% FBS or 1% FBS for 12 h or 24 h. (b) Relative metabolic activity of HaCaTs under the indicated conditions, measured by CCK assay. (c) Relative metabolic activity of HDFs under the indicated conditions, measured by CCK assay. Short-term low-serum exposure reduced relative metabolic activity compared with 10% FBS controls, with a greater effect after 24 h, while gross cellular morphology was largely preserved. Values were normalized to the corresponding 10% FBS control at each time point. Data are presented as mean  $\pm$  SD.

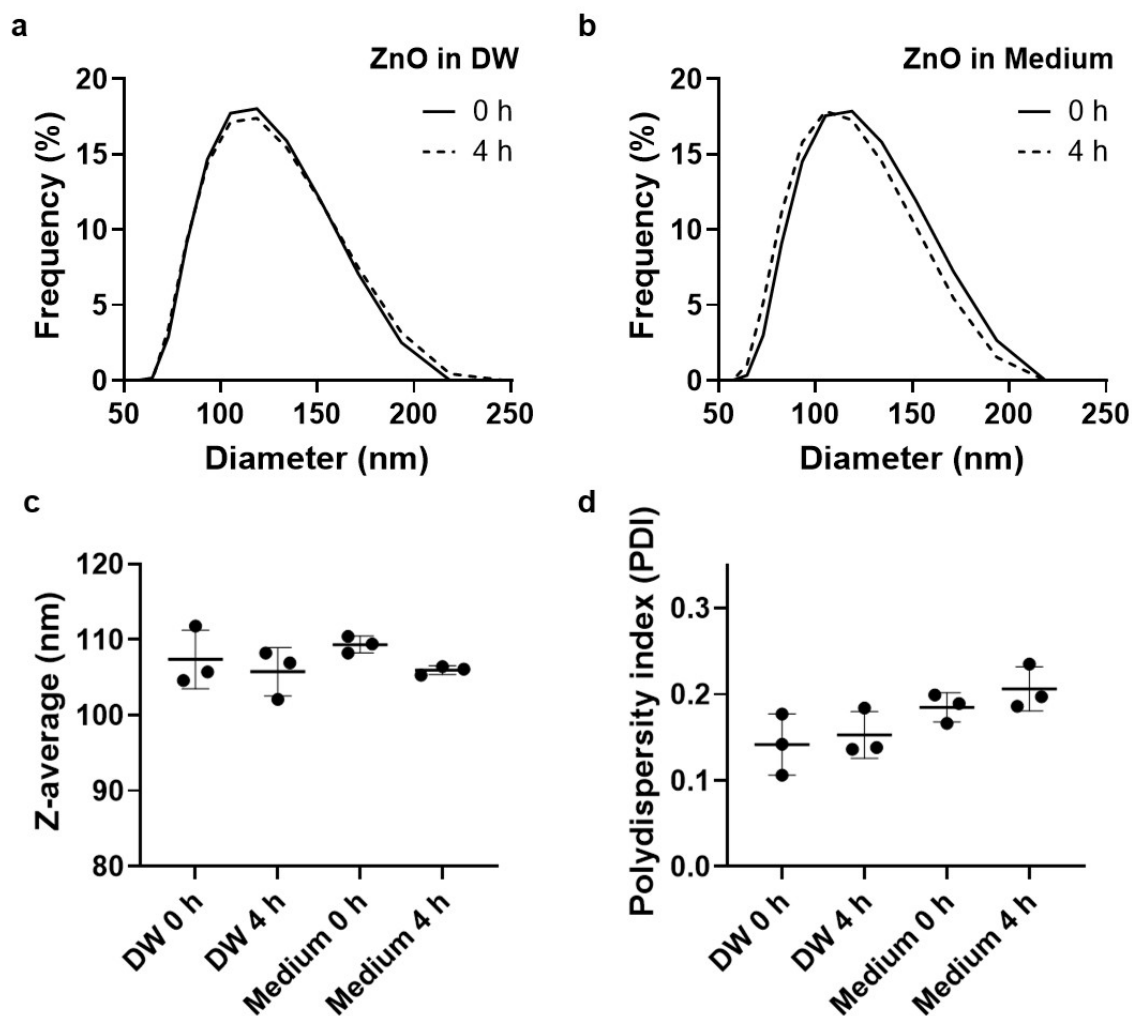

**Figure S3. Dynamic light scattering (DLS) characterization of ZnO under relevant working conditions.**

(a) Representative DLS size distribution curves of ZnO dispersions in deionized water (DW) immediately after preparation and after 4 h incubation. (b) Representative DLS size distribution curves of ZnO dispersions in 1% FBS-containing DMEM/F-12 immediately after preparation and after 4 h incubation. (c) Z-average hydrodynamic diameters of ZnO-containing samples under the indicated conditions. (d) Polydispersity index (PDI) values of ZnO-containing samples under the indicated conditions.

| <i>Condition</i>          | <i>Count rate (kCPS)</i> | <i>Z-average (nm)</i> | <i>PDI</i>    |
|---------------------------|--------------------------|-----------------------|---------------|
| <i>DW blank</i>           | 0–1                      | ND                    | ND            |
| <i>Medium blank</i>       | 0–1                      | ND                    | ND            |
| <i>ZnO in DW, 0 h</i>     | 753 ± 49                 | 107.4 ± 3.9           | 0.142 ± 0.036 |
| <i>ZnO in DW, 4 h</i>     | 974 ± 80                 | 105.7 ± 3.2           | 0.086 ± 0.085 |
| <i>ZnO in medium, 0 h</i> | 869 ± 43                 | 109.3 ± 1.1           | 0.185 ± 0.017 |
| <i>ZnO in medium, 4 h</i> | 1037 ± 182               | 105.9 ± 0.6           | 0.206 ± 0.026 |

**Table S1. Summary of DLS-derived count rate, Z-average hydrodynamic diameter, and polydispersity index (PDI) for ZnO dispersions under the indicated conditions.**

Blank deionized water and blank 1% FBS-containing DMEM/F-12 controls yielded only near-background count rates (0–1 kCPS) without a reproducible particle peak; therefore, size statistics from blank runs were not interpreted. Data are presented as mean ± SD (n = 3). kCPS, kilo counts per second; ND, not determined.

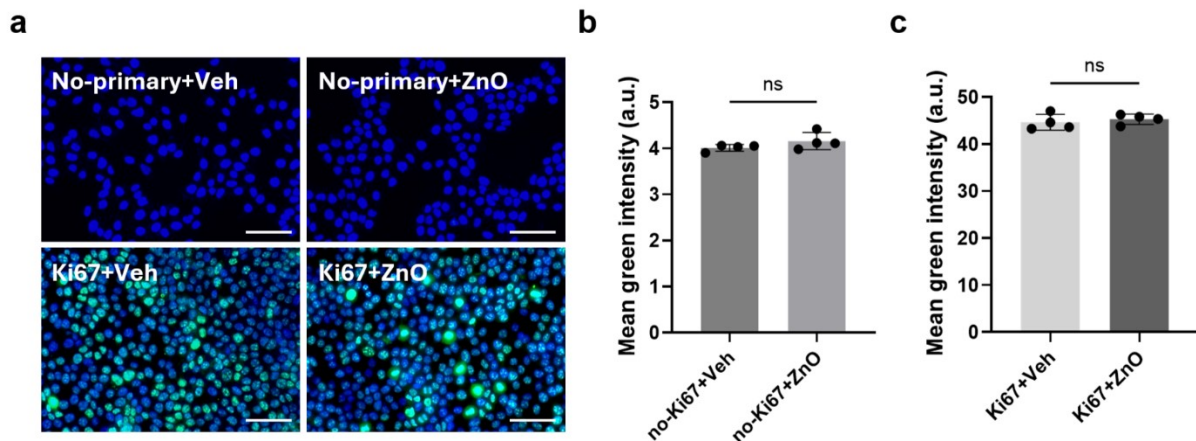

**Figure S4. Control experiments excluding ZnO-related optical artefacts in Ki67 immunofluorescence imaging.**

(a) Representative merged images of DAPI and green-channel signal from HaCaT samples processed either without Ki67 primary antibody (No-primary control) or with full Ki67 immunostaining under vehicle (Veh) or ZnO-treated conditions, using the same acquisition settings. (b) Quantification of mean green-channel intensity in the No-primary control samples. (c) Quantification of mean green-channel intensity in the corresponding Ki67-stained samples. Data are presented as mean ± SD; ns, not significant. Scale bars = 100 μm.

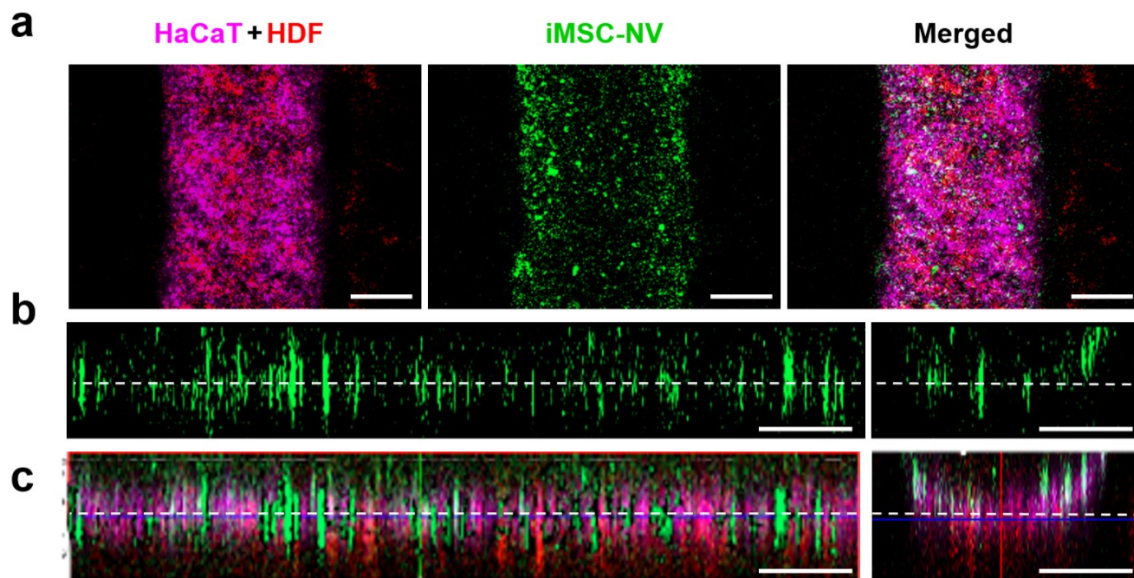

**Figure S5. Split-channel and orthogonal views of the representative ROI shown in Fig. 4f.**

(a) En face views of the same ROI showing the combined HaCaT/HDF channels (HaCaT, magenta; HDF, red), the iMSC-NV channel (green), and the merged image. (b) Orthogonal views of the iMSC-NV channel from the same ROI. (c) Corresponding orthogonal views of the merged image. Dashed white lines indicate the position of the porous membrane. Scale bars = 200  $\mu\text{m}$ .
